# Supplementary material for: Hidden interactions in the intertidal rocky shore: variation in pedal mucus microbiota among marine grazers that feed on epilithic biofilm communities
Source: PeerJ journal article supplement (doi:10.7717/peerj.13642), 2022-09-23

## Supplement 1.

**Table S1:** Description, DNA extraction and 16S rRNA gene sequencing characteristics of the most abundant grazer's microbiota and epilithic biofilm samples.

| ID                  | Treatment/<br>Microbiota     | Foot Area<br>(cm <sup>2</sup> ) or<br>Rock Area<br>(cm <sup>2</sup> ) | ng<br>dDNA/uL | Number of<br>QC reads | Number of<br>ASVs | Number of<br>reads after<br>rarefaction<br>with control | Number of<br>ASVs after<br>rarefaction<br>with control | Number of<br>reads after<br>rarefaction<br>without<br>control | Number of<br>ASVs after<br>rarefaction<br>without<br>control |
|---------------------|------------------------------|-----------------------------------------------------------------------|---------------|-----------------------|-------------------|---------------------------------------------------------|--------------------------------------------------------|---------------------------------------------------------------|--------------------------------------------------------------|
| C.granosus_47       | <i>C. granosus</i>           | 8.05                                                                  | 44.6          | 14521                 | 266               | 1869                                                    | 215                                                    | 10599                                                         | 265                                                          |
| C.granosus_48       | <i>C. granosus</i>           | 7.16                                                                  | 51            | 15543                 | 192               | 1869                                                    | 135                                                    | 10599                                                         | 190                                                          |
| C.granosus_49       | <i>C. granosus</i>           | 5.11                                                                  | 46.8          | 16135                 | 250               | 1869                                                    | 195                                                    | 10599                                                         | 246                                                          |
| C.granosus_50       | <i>C. granosus</i>           | 4.08                                                                  | 53.6          | 21317                 | 255               | 1869                                                    | 171                                                    | 10599                                                         | 244                                                          |
| E.peruviana_57      | <i>E. peruviana</i>          | 0.09                                                                  | 37.4          | 29434                 | 84                | 1869                                                    | 51                                                     | 10599                                                         | 82                                                           |
| E.peruviana_58      | <i>E. peruviana</i>          | 0.24                                                                  | 33.6          | 16898                 | 125               | 1869                                                    | 89                                                     | 10599                                                         | 122                                                          |
| E.peruviana_59      | <i>E. peruviana</i>          | 0.22                                                                  | 12.4          | 74324                 | 165               | 1869                                                    | 72                                                     | 10599                                                         | 130                                                          |
| E.peruviana_60      | <i>E. peruviana</i>          | 0.32                                                                  | 25.2          | 15918                 | 94                | 1869                                                    | 81                                                     | 10599                                                         | 93                                                           |
| F.crassa_38         | <i>F. crassa</i>             | 31.10                                                                 | 45.4          | 21750                 | 221               | 1869                                                    | 169                                                    | 10599                                                         | 220                                                          |
| F.crassa_40         | <i>F. crassa</i>             | 26.72                                                                 | 74.4          | 19390                 | 212               | 1869                                                    | 159                                                    | 10599                                                         | 204                                                          |
| F.crassa_53         | <i>F. crassa</i>             | 15.37                                                                 | 52.2          | 10599                 | 139               | 1869                                                    | 120                                                    | 10599                                                         | 139                                                          |
| F.crassa_54         | <i>F. crassa</i>             | 14.14                                                                 | 36.4          | 16151                 | 158               | 1869                                                    | 127                                                    | 10599                                                         | 154                                                          |
| F.crassa_55         | <i>F. crassa</i>             | 27.90                                                                 | 59.6          | 15917                 | 226               | 1869                                                    | 169                                                    | 10599                                                         | 226                                                          |
| S.raucana_41        | <i>S. Araucana</i>           | 7.05                                                                  | 59.2          | 54228                 | 140               | 1869                                                    | 86                                                     | 10599                                                         | 125                                                          |
| S.raucana_42        | <i>S. Araucana</i>           | 0.43                                                                  | 33            | 29719                 | 257               | 1869                                                    | 141                                                    | 10599                                                         | 237                                                          |
| S.raucana_43        | <i>S. Araucana</i>           | 0.06                                                                  | 28.4          | 34974                 | 197               | 1869                                                    | 118                                                    | 10599                                                         | 186                                                          |
| S.raucana_44        | <i>S. Araucana</i>           | 0.23                                                                  | 14            | 75493                 | 384               | 1869                                                    | 191                                                    | 10599                                                         | 311                                                          |
| S.raucana_45        | <i>S. Araucana</i>           | 0.37                                                                  | 45.2          | 23971                 | 338               | 1869                                                    | 221                                                    | 10599                                                         | 328                                                          |
| S.lessonii_62       | <i>S. lessonii</i>           | 0.12                                                                  | 31            | 74566                 | 145               | 1869                                                    | 63                                                     | 10599                                                         | 128                                                          |
| S.lessonii_63       | <i>S. lessonii</i>           | 0.11                                                                  | 55.2          | 28785                 | 120               | 1869                                                    | 75                                                     | 10599                                                         | 117                                                          |
| S.lessonii_64       | <i>S. lessonii</i>           | 0.20                                                                  | 30            | 33081                 | 138               | 1869                                                    | 98                                                     | 10599                                                         | 134                                                          |
| S.lessonii_65       | <i>S. lessonii</i>           | 0.17                                                                  | 65.4          | 11137                 | 68                | 1869                                                    | 61                                                     | 10599                                                         | 68                                                           |
| EpilithicBiofilm_1  | Epilithic biofilm<br>control | 28.25                                                                 | 59            | 1869                  | 118               | 1869                                                    | 118                                                    | -                                                             | -                                                            |
| EpilithicBiofilm_5  | Epilithic biofilm<br>control | 23.71                                                                 | 37.2          | 4449                  | 101               | 1869                                                    | 100                                                    | -                                                             | -                                                            |
| EpilithicBiofilm_27 | Epilithic biofilm<br>control | 27.39                                                                 | 26.4          | 21089                 | 400               | 1869                                                    | 284                                                    | -                                                             | -                                                            |
| EpilithicBiofilm_29 | Epilithic biofilm<br>control | 20.00                                                                 | 30.4          | 2236                  | 111               | 1869                                                    | 111                                                    | -                                                             | -                                                            |
| <b>TOTAL</b>        | -                            | -                                                                     | -             | <b>683494</b>         | <b>1934</b>       | <b>48594</b>                                            | <b>958</b>                                             | <b>233178</b>                                                 | <b>1205</b>                                                  |

**Figure S1.** First rarefaction curves with the epilithic biofilm control and the pedal mucus microbiota of *Chiton granosus*, *Echinolittorina peruviana*, *Fissurella crassa*, *Scurria araucana* and *Siphonaria lessonii*. Rarefaction level of 1,869 reads.

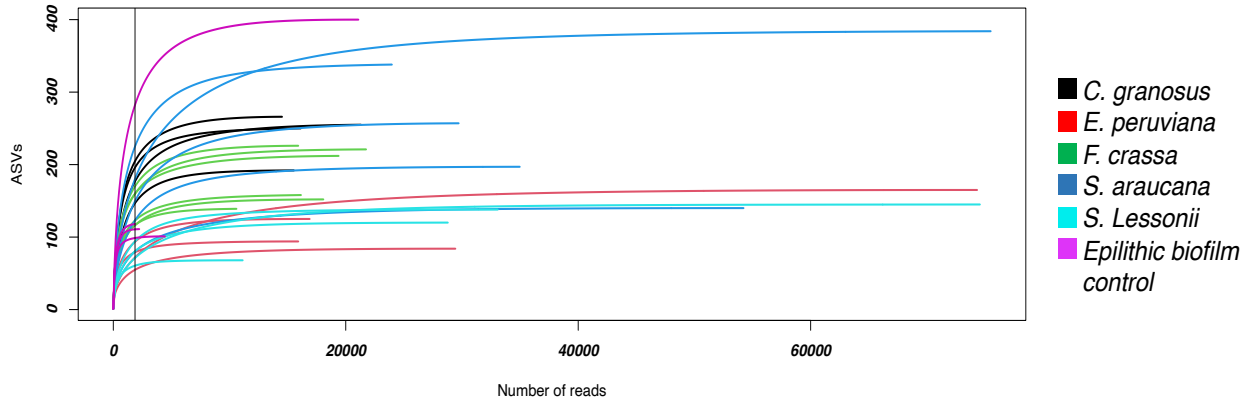

**Figure S2.** Second rarefaction curves with the pedal mucus microbiota of *Chiton granosus*, *Echinolittorina peruviana*, *Fissurella crassa*, *Scurria araucana* and *Siphonaria lessonii*. Rarefaction level of 10,599 reads.

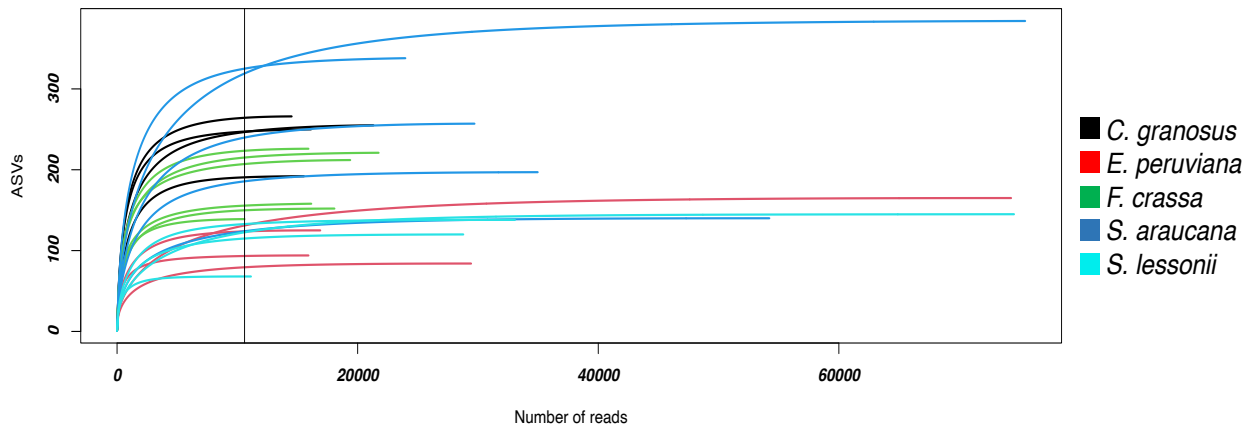

**Supplement 2.**

**Figure S1.** Pedal mucus stained with 0.01% acridine orange (right) and gram (left) of (A, B) *C. granosus*, (C, D) *E. peruviana*, (E, F) *F. crassa*, (G, H) *S. araucana*, and (I, J) *S. lessonii*. Photography by Clara Arboleda-Baena.

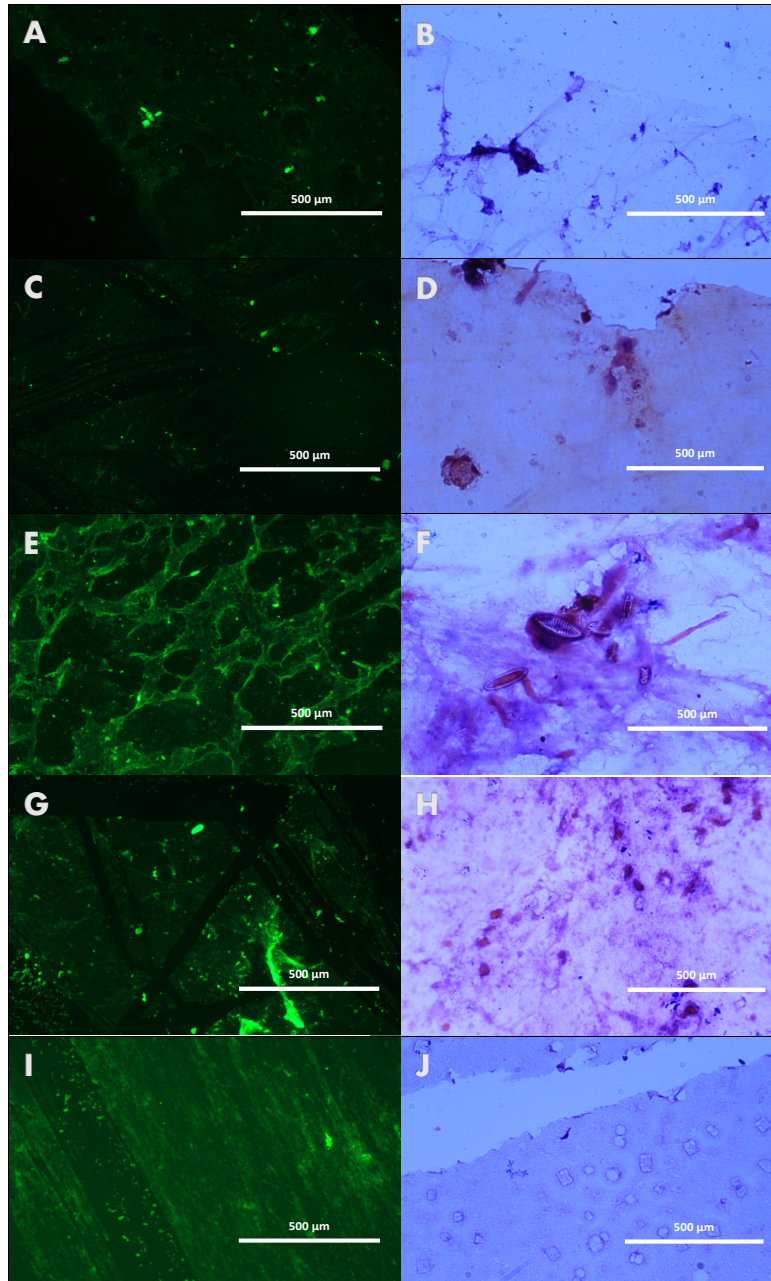

### Supplement 3

**Table S1:** Taxa contribution percentage in the microbial community of pedal mucus microbiota of *Chiton granosus*, *Echinolittorina peruviana*, *Fissurella crassa*, *Scurria araucana* and *Siphonaria lessonii* and the Epilithic Biofilm Control. Red color percentage corresponds to the most abundant taxa of mayor microbial phyla, with a relative abundance of reads > 1% (Pedrós-Alió 2012). Rarefaction level <2000 reads.

| TAXA                | Epilithic Biofilm Control | Microbiota <i>C. granosus</i> | Microbiota <i>E. peruviana</i> | Microbiota <i>F. crassa</i> | Microbiota <i>S. araucana</i> | Microbiota <i>S. lessonii</i> |
|---------------------|---------------------------|-------------------------------|--------------------------------|-----------------------------|-------------------------------|-------------------------------|
| Acidobacteria       | 0.16                      | 0.00                          | 0.00                           | 0.02                        | 0.03                          | 0.00                          |
| Actinobacteria      | 0.32                      | 0.08                          | 0.00                           | 0.05                        | 0.04                          | 0.00                          |
| Alphaproteobacteria | <b>60.56</b>              | <b>20.46</b>                  | <b>8.57</b>                    | <b>14.02</b>                | <b>23.99</b>                  | <b>10.71</b>                  |
| Bacteroidetes       | <b>12.86</b>              | <b>66.52</b>                  | <b>8.09</b>                    | <b>67.29</b>                | <b>49.88</b>                  | <b>5.09</b>                   |
| Cyanobacteria       | 0.17                      | 0.08                          | 0.03                           | 0.08                        | 0.14                          | 0.00                          |
| Dadabacteria        | 0.24                      | 0.00                          | 0.00                           | 0.00                        | 0.00                          | 0.00                          |
| Deinococcus-Thermus | 0.00                      | 0.00                          | 0.00                           | 0.00                        | 0.00                          | 0.03                          |
| Deltaproteobacteria | 0.90                      | 0.04                          | 0.00                           | 0.69                        | 0.12                          | 0.03                          |
| Dependentiae        | 0.59                      | 0.00                          | 0.00                           | 0.00                        | 0.00                          | 0.00                          |
| Epsilonbacteraeota  | 0.04                      | 0.17                          | <b>14.69</b>                   | 0.96                        | 0.58                          | <b>6.33</b>                   |
| Firmicutes          | 0.27                      | 0.00                          | 0.00                           | 0.00                        | 0.03                          | 0.13                          |
| Fusobacteria        | 0.00                      | 0.09                          | 0.00                           | 0.00                        | 0.00                          | 0.00                          |
| Gammaproteobacteria | <b>1.93</b>               | <b>10.95</b>                  | <b>66.17</b>                   | <b>12.89</b>                | <b>24.87</b>                  | <b>77.45</b>                  |
| Other               | 0.00                      | 0.00                          | 0.00                           | 0.00                        | 0.00                          | 0.00                          |
| Patescibacteria     | 0.00                      | 0.32                          | 0.00                           | 0.18                        | 0.17                          | 0.01                          |
| Planctomycetes      | <b>19.74</b>              | 0.07                          | 0.00                           | 0.12                        | 0.05                          | 0.00                          |
| Spirochaetes        | 0.00                      | 0.00                          | 0.00                           | 0.32                        | 0.00                          | 0.03                          |
| Tenericutes         | 0.00                      | 0.00                          | 0.00                           | 0.03                        | 0.00                          | 0.03                          |
| Thaumarchaeota      | 0.05                      | 0.00                          | 0.00                           | 0.00                        | 0.00                          | 0.00                          |
| Unclassified        | 0.06                      | 0.00                          | 0.00                           | 0.00                        | 0.00                          | 0.00                          |
| Verrucomicrobia     | <b>2.10</b>               | <b>1.20</b>                   | <b>2.47</b>                    | <b>3.36</b>                 | 0.08                          | 0.16                          |
| <b>TOTAL</b>        | <b>100</b>                | <b>100</b>                    | <b>100</b>                     | <b>100</b>                  | <b>100</b>                    | <b>100</b>                    |



**Table S2:** Total reads of the most abundant ASVs of the pedal mucus microbiota of *Chiton granosus*, *Echinolittorina peruviana*, *Fissurella crassa*, *Scurria araucana*, and *Siphonaria lessonii*. Rarefaction level of 10,599 reads.

| Phylum             | Class               | Order             | Family                 | <i>C.granosus</i> | <i>E.peruviana</i> | <i>F.crassa</i> | <i>S.raucana</i> | <i>S.lessonii</i> | TotalReads |     |
|--------------------|---------------------|-------------------|------------------------|-------------------|--------------------|-----------------|------------------|-------------------|------------|-----|
| Bacteroidetes      | Bacteroidia         | Chitinophagales   | Saprosiraceae          | 149               | 11                 | 13              | 31               | 6                 | 209        |     |
|                    |                     | Cytophagales      | Cyclobacteriaceae      | 46                | 12                 | 69              | 15               | 5                 | 146        |     |
|                    |                     | Flavobacteriales  | Crociniomicaceae       | 3152              | 0                  | 827             | 233              | 0                 | 4213       |     |
|                    |                     |                   | Cryomorpaceae          | 339               | 0                  | 60              | 292              | 7                 | 699        |     |
|                    |                     |                   | Flavobacteriaceae      | 3367              | 821                | 6291            | 4669             | 531               | 15678      |     |
| Epsilonbacteraeota | Campylobacteria     | Campylobacterales | Arcobacteraceae        | 14                | 1526               | 124             | 64               | 641               | 2369       |     |
| Proteobacteria     | Alphaproteobacteria | Rhodobacterales   | Rhodobacteraceae       | 2060              | 848                | 1251            | 2435             | 1189              | 7782       |     |
|                    |                     |                   | Alteromonadaceae       | 307               | 781                | 17              | 240              | 1095              | 2439       |     |
|                    | Gammaproteobacteria | Alteromonadales   | Colwelliaceae          | 368               | 3430               | 71              | 551              | 3900              | 8320       |     |
|                    |                     |                   | Pseudoalteromonadaceae | 29                | 40                 | 73              | 416              | 133               | 691        |     |
|                    |                     |                   | Shewanellaceae         | 17                | 8                  | 47              | 30               | 9                 | 112        |     |
|                    |                     |                   | Cellvibrionales        | Cellvibrionaceae  | 18                 | 125             | 3                | 25                | 253        | 423 |
|                    |                     | Oceanospirillales | Marinomonadaceae       | 1                 | 860                | 17              | 129              | 977               | 1984       |     |
|                    |                     |                   | Nitrocolaceae          | 83                | 466                | 107             | 480              | 344               | 1479       |     |
|                    |                     |                   | Saccharospirillaceae   | 35                | 1096               | 65              | 54               | 896               | 2146       |     |
|                    | Vibrionales         | Vibrionaceae      | 218                    | 244               | 918                | 594             | 475              | 2447              |            |     |
|                    | Verrucomicrobia     | Verrucomicrobiae  | Verrucomicrobiales     | Rubritaleaceae    | 130                | 245             | 276              | 11                | 19         | 681 |

Supplement 4.

**Figure S1:** Microbiota compositional similarity of the most abundant grazers of the intertidal rocky shore and the epilithic biofilm. Non-metric multidimensional scaling (NMDS) ordination plots based on Jaccard distances. The shapes denote the microbiota grazer species surrounded by an ellipse showing the 95% confidence interval. Stress = 0.101. Rarefaction level <2000 reads.

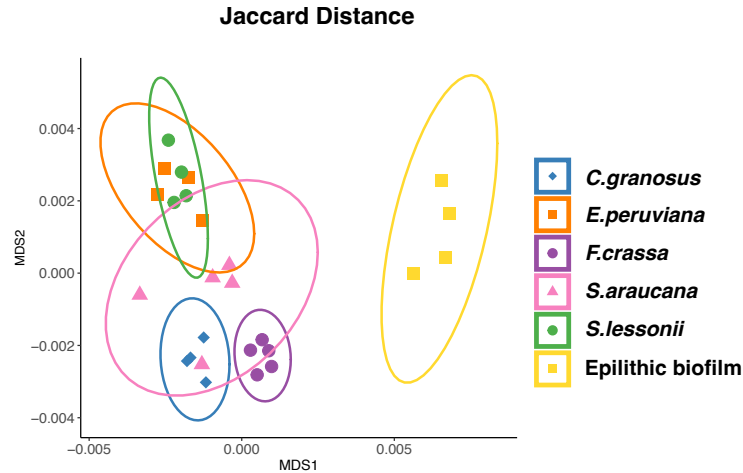

**Table S1: Bray-Curtis distance.** False Discovery Rate (FDR) corrected (Benjamini and Hochberg 1995) pairwise comparisons of the microbial communities of the pedal mucus microbiota of *Chiton granosus*, *Echinolittorina peruviana*, *Fissurella crassa*, *Scurria araucana*, and *Siphonaria lessonii* and the epilithic biofilms. Rarefaction level <2000 reads.

| pairs                                   | Df | Sums of Sqs | F. Model | R <sup>2</sup> | p .value | p. adjusted sig |
|-----------------------------------------|----|-------------|----------|----------------|----------|-----------------|
| <i>C.granosus</i> vs <i>E.peruviana</i> | 1  | 0.93        | 5.00     | 0.45           | 0.03     | 0.04            |
| <i>C.granosus</i> vs <i>F.crassa</i>    | 1  | 1.04        | 6.94     | 0.50           | 0.01     | 0.02            |
| <i>C.granosus</i> vs <i>S.araucana</i>  | 1  | 0.50        | 2.14     | 0.23           | 0.05     | 0.05            |
| <i>C.granosus</i> vs <i>S.lessonii</i>  | 1  | 0.94        | 5.62     | 0.48           | 0.03     | 0.04            |
| <i>C.granosus</i> vs Epilithic biofilm  | 1  | 1.42        | 8.04     | 0.57           | 0.03     | 0.04            |
| <i>E.peruviana</i> vs <i>F.crassa</i>   | 1  | 1.34        | 9.67     | 0.58           | 0.01     | 0.02            |
| <i>E.peruviana</i> vs <i>S.araucana</i> | 1  | 0.76        | 3.45     | 0.33           | 0.01     | 0.02            |
| <i>E.peruviana</i> vs <i>S.lessonii</i> | 1  | 0.05        | 0.33     | 0.05           | 0.91     | 0.91            |
| <i>E.peruviana</i> vs Epilithic biofilm | 1  | 1.49        | 9.13     | 0.60           | 0.02     | 0.04            |
| <i>F.crassa</i> vs <i>S.araucana</i>    | 1  | 1.00        | 5.41     | 0.40           | 0.01     | 0.02            |
| <i>F.crassa</i> vs <i>S.lessonii</i>    | 1  | 1.37        | 11.20    | 0.62           | 0.01     | 0.02            |
| <i>F.crassa</i> vs Epilithic biofilm    | 1  | 1.70        | 13.10    | 0.65           | 0.01     | 0.02            |
| <i>S.araucana</i> vs <i>S.lessonii</i>  | 1  | 0.78        | 3.80     | 0.35           | 0.01     | 0.02            |
| <i>S.araucana</i> vs Epilithic biofilm  | 1  | 1.44        | 6.79     | 0.49           | 0.01     | 0.02            |
| <i>S.lessonii</i> vs Epilithic biofilm  | 1  | 1.55        | 10.73    | 0.64           | 0.03     | 0.04            |

**Table S2: Jaccard distance.** False Discovery Rate (FDR) corrected (Benjamini and Hochberg 1995) pairwise comparisons of the microbial communities of the pedal mucus microbiota of *Chiton granosus*, *Echinolittorina peruviana*, *Fissurella crassa*, *Scurria araucana*, and *Siphonaria lessonii* and the epilithic biofilms. Rarefaction level <2000 reads.

| pairs                            | Df       | Sums of Sqs | F. Model    | R <sup>2</sup> | p .value    | p. adjusted sig |
|----------------------------------|----------|-------------|-------------|----------------|-------------|-----------------|
| C.granosus vs E.peruviana        | 1        | 0.93        | 5.00        | 0.45           | 0.04        | 0.04            |
| C.granosus vs F.crassa           | 1        | 1.04        | 6.94        | 0.50           | 0.01        | 0.02            |
| C.granosus vs S.araucana         | 1        | 0.50        | 2.14        | 0.23           | 0.05        | 0.05            |
| C.granosus vs S.lessonii         | 1        | 0.94        | 5.62        | 0.48           | 0.02        | 0.03            |
| C.granosus vs Epilithic biofilm  | 1        | 1.42        | 8.04        | 0.57           | 0.03        | 0.04            |
| E.peruviana vs F.crassa          | 1        | 1.34        | 9.67        | 0.58           | 0.00        | 0.02            |
| E.peruviana vs S.araucana        | 1        | 0.76        | 3.45        | 0.33           | 0.01        | 0.02            |
| <b>E.peruviana vs S.lessonii</b> | <b>1</b> | <b>0.05</b> | <b>0.33</b> | <b>0.05</b>    | <b>0.91</b> | <b>0.91</b>     |
| E.peruviana vs Epilithic biofilm | 1        | 1.49        | 9.13        | 0.60           | 0.03        | 0.04            |
| F.crassa vs S.araucana           | 1        | 1.00        | 5.41        | 0.40           | 0.01        | 0.02            |
| F.crassa vs S.lessonii           | 1        | 1.37        | 11.20       | 0.62           | 0.02        | 0.03            |
| F.crassa vs Epilithic biofilm    | 1        | 1.70        | 13.10       | 0.65           | 0.01        | 0.02            |
| S.araucana vs S.lessonii         | 1        | 0.78        | 3.80        | 0.35           | 0.01        | 0.02            |
| S.araucana vs Epilithic biofilm  | 1        | 1.44        | 6.79        | 0.49           | 0.01        | 0.02            |
| S.lessonii vs Epilithic biofilm  | 1        | 1.55        | 10.73       | 0.64           | 0.02        | 0.03            |

**Figure S2:** Microbiota compositional similarity of the most abundant grazers of the intertidal rocky shore. Non-metric multidimensional scaling (NMDS) ordination plots based on (A) Bray-Curtis and (B) Jaccard distances. The shapes denote the microbiota grazer species surrounded by an ellipse showing the 95% confidence interval. (A) Stress = 0.112, (B) stress = 0.112. Rarefaction level of 10,599 reads.

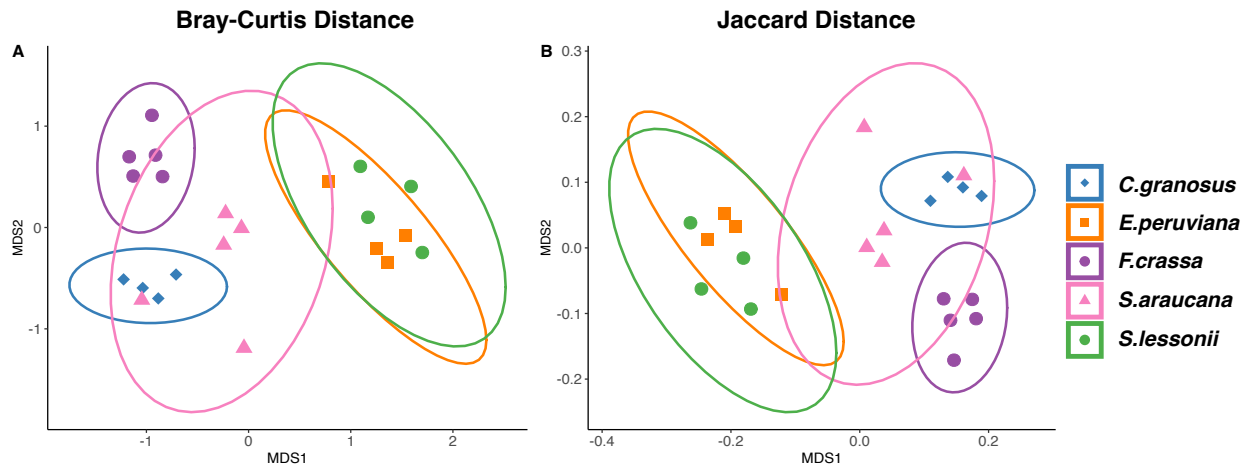

**Table S3: Bray-Curtis distance.** Permanova  $p > 0.001$ . False Discovery Rate (FDR) corrected (Benjamini and Hochberg 1995) pairwise comparisons of the microbial communities of the pedal mucus microbiota of *Chiton granosus*, *Echinolittorina peruviana*, *Fissurella crassa*, *Scurria araucana*, and *Siphonaria lessonii*. Rarefaction level of 10,599 reads.

| <b>pairs</b>                     | <b>Df</b> | <b>SumsOfSqs</b> | <b>F.Model</b> | <b>R2</b>   | <b>p.value</b> | <b>p.adjusted</b> | <b>sig</b> |
|----------------------------------|-----------|------------------|----------------|-------------|----------------|-------------------|------------|
| C.granosus vs E.peruviana        | 1         | 0.95             | 5.38           | 0.47        | 0.03           | 0.04              | .          |
| C.granosus vs F.crassa           | 1         | 1.04             | 7.41           | 0.51        | 0.01           | 0.02              | .          |
| C.granosus vs S.araucana         | 1         | 0.51             | 2.23           | 0.24        | 0.04           | 0.04              | .          |
| C.granosus vs S.lessonii         | 1         | 0.93             | 5.88           | 0.50        | 0.03           | 0.04              | .          |
| E.peruviana vs F.crassa          | 1         | 1.36             | 10.22          | 0.59        | 0.01           | 0.02              | .          |
| E.peruviana vs S.araucana        | 1         | 0.78             | 3.55           | 0.34        | 0.01           | 0.02              | .          |
| <b>E.peruviana vs S.lessonii</b> | <b>1</b>  | <b>0.05</b>      | <b>0.34</b>    | <b>0.05</b> | <b>0.93</b>    | <b>0.93</b>       | .          |
| F.crassa vs S.araucana           | 1         | 1.01             | 5.53           | 0.41        | 0.01           | 0.02              | .          |
| F.crassa vs S.lessonii           | 1         | 1.38             | 11.74          | 0.63        | 0.01           | 0.02              | .          |
| S.araucana vs S.lessonii         | 1         | 0.77             | 3.76           | 0.35        | 0.01           | 0.02              | .          |

**Table S4: Jaccard distance.** Permanova  $p > 0.001$ . False Discovery Rate (FDR) corrected (Benjamini and Hochberg 1995) pairwise comparisons of the microbial communities of the pedal mucus microbiota of *Chiton granosus*, *Echinolittorina peruviana*, *Fissurella crassa*, *Scurria araucana*, and *Siphonaria lessonii*. Rarefaction level of 10,599 reads.

| <b>pairs</b>                     | <b>Df</b> | <b>SumsOfSqs</b> | <b>F.Model</b> | <b>R2</b>   | <b>p.value</b> | <b>p.adjusted</b> | <b>sig</b> |
|----------------------------------|-----------|------------------|----------------|-------------|----------------|-------------------|------------|
| C.granosus vs E.peruviana        | 1         | 0.95             | 5.38           | 0.47        | 0.03           | 0.03              | .          |
| C.granosus vs F.crassa           | 1         | 1.04             | 7.41           | 0.51        | 0.01           | 0.02              | .          |
| C.granosus vs S.araucana         | 1         | 0.51             | 2.23           | 0.24        | 0.02           | 0.03              | .          |
| C.granosus vs S.lessonii         | 1         | 0.93             | 5.88           | 0.50        | 0.02           | 0.03              | .          |
| E.peruviana vs F.crassa          | 1         | 1.36             | 10.22          | 0.59        | 0.01           | 0.02              | .          |
| E.peruviana vs S.araucana        | 1         | 0.78             | 3.55           | 0.34        | 0.01           | 0.02              | .          |
| <b>E.peruviana vs S.lessonii</b> | <b>1</b>  | <b>0.05</b>      | <b>0.34</b>    | <b>0.05</b> | <b>0.91</b>    | <b>0.91</b>       | .          |
| F.crassa vs S.araucana           | 1         | 1.01             | 5.53           | 0.41        | 0.01           | 0.02              | .          |
| F.crassa vs S.lessonii           | 1         | 1.38             | 11.74          | 0.63        | 0.01           | 0.02              | .          |
| S.araucana vs S.lessonii         | 1         | 0.77             | 3.76           | 0.35        | 0.01           | 0.02              | .          |

**Figure S3.** PERMDISP analyses for a dataset of rarefaction level <2000 reads. The figure showed the distance to the centroid of *C.granosus*, *E.peruviana*, *F. crassa*, *S.araucana*, and *S. lessonii* and the epilithic biofilms group.

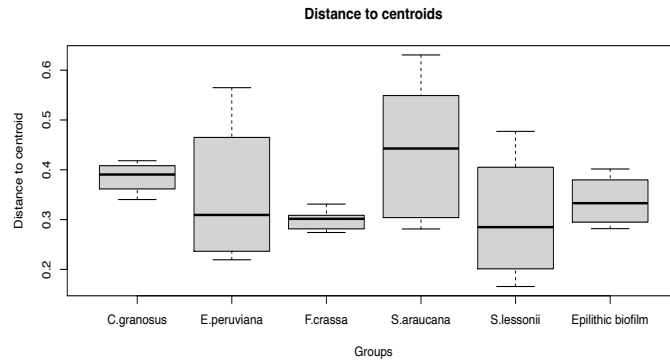

Analysis of Variance Table (Response: Distances)

|           | Df | Sum Sq.  | Mean.Sq  | F value | Pr(>F) |
|-----------|----|----------|----------|---------|--------|
| Groups    | 5  | 0.068535 | 0.013707 | 1.176   | 0.3555 |
| Residuals | 20 | 0.233119 | 0.011656 |         |        |

**Figure S4.** PERMDISP analyses for a dataset of rarefaction level 10,599 reads. The figure showed the distance to the centroid of *C.granosus*, *E.peruviana*, *F. crassa*, *S.araucana*, and *S. lessonii* group.

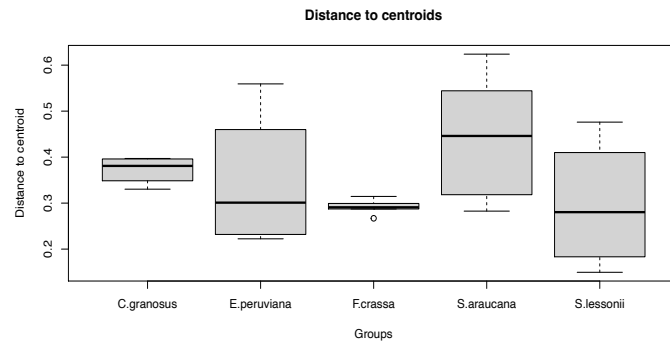

Analysis of Variance Table ( Response: Distances)

|           | Df | Sum Sq   | Mean Sq  | F value | Pr(>F) |
|-----------|----|----------|----------|---------|--------|
| Groups    | 4  | 0.073608 | 0.018402 | 1.4046  | 0.2747 |
| Residuals | 17 | 0.222730 | 0.013102 |         |        |

## Supplement 5

**Figure S1.** Mean **A)** richness and **B)** Shannon index diversity of microbial community (Bacteria and Archaea) of the pedal mucus microbiota of *C. granosus*, *F. crassa*, *S. araucana*, *E. peruviana*, *S. lessonii* and the epilithic biofilm (mean + SE). Different letters above bars indicate significant differences (among treatments from Tukey test at the experiment-wise error rate = 0.05). Rarefaction level of 1,869 reads.

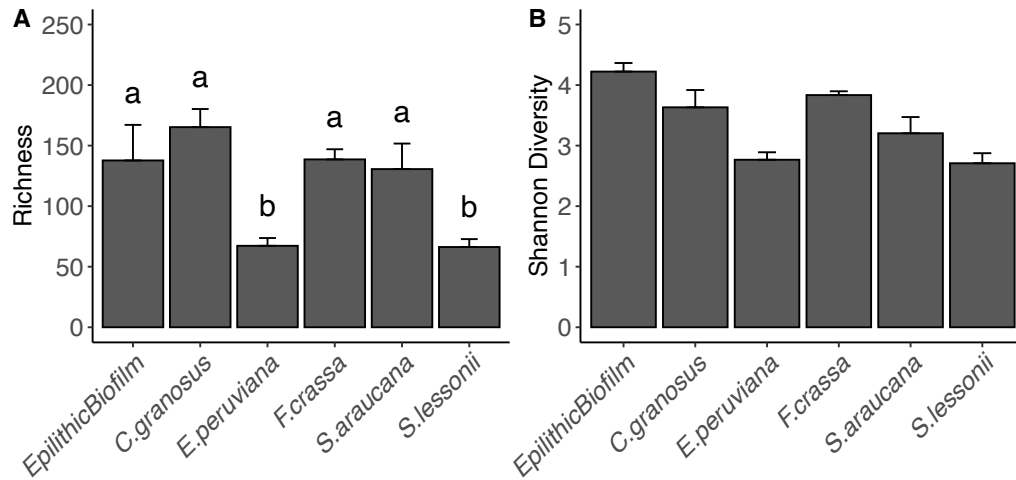

**Figure S2.** Mean **A)** richness and **B)** Shannon index diversity of the microbial community (Bacteria and Archaea) of the pedal mucus microbiota of *C. granosus*, *F. crassa*, *S. araucana*, *E. peruviana*, *S. lessonii* (mean + SE). Different letters above bars indicate significant differences (among treatments from Tukey test at the experiment-wise error rate = 0.05). Rarefaction level of 10,599 reads.

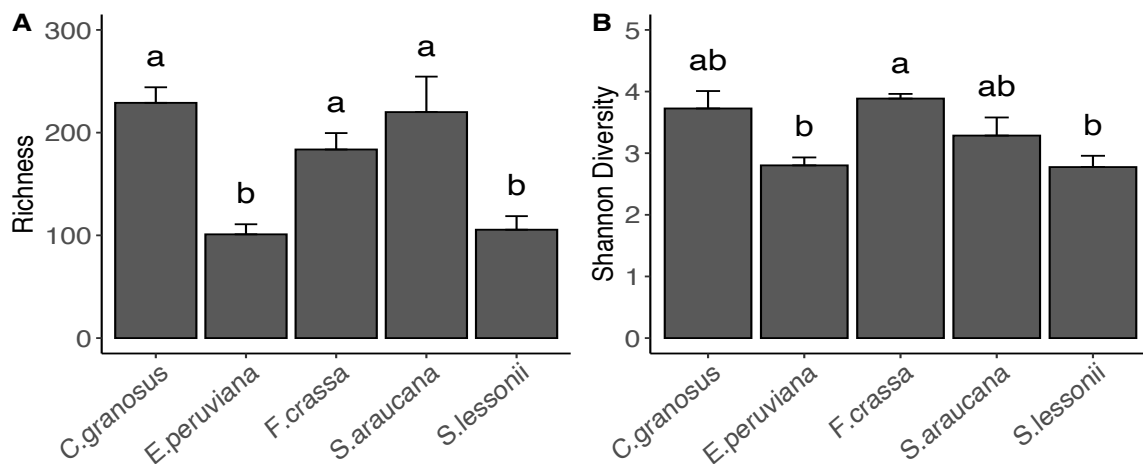

**Supplement 6.**

**Table S1:** Tukey post hoc test multiple comparisons of richness of the microbial communities of the pedal mucus microbiota and the epilithic biofilms. 95% family-wise confidence level. Rarefaction level of 1,869 reads.

| Comparisons                          | diff   | lwr    | upr    | p adj |
|--------------------------------------|--------|--------|--------|-------|
| <i>E.peruviana-C.granosus</i>        | -0.391 | -0.648 | -0.134 | 0.001 |
| <i>F.crassa-C.granosus</i>           | -0.074 | -0.318 | 0.170  | 0.927 |
| <i>S.raucana-C.granosus</i>          | -0.120 | -0.364 | 0.123  | 0.636 |
| <i>S.lessonii-C.granosus</i>         | -0.397 | -0.654 | -0.140 | 0.001 |
| EpilithicBiofilm- <i>C.granosus</i>  | -0.098 | -0.355 | 0.159  | 0.831 |
| <i>F.crassa-E.peruviana</i>          | 0.317  | 0.074  | 0.561  | 0.006 |
| <i>S.raucana-E.peruviana</i>         | 0.271  | 0.027  | 0.514  | 0.024 |
| <i>S.lessonii-E.peruviana</i>        | -0.006 | -0.263 | 0.251  | 1.000 |
| EpilithicBiofilm- <i>E.peruviana</i> | 0.293  | 0.036  | 0.550  | 0.020 |
| <i>S.raucana-F.crassa</i>            | -0.046 | -0.276 | 0.183  | 0.987 |
| <i>S.lessonii-F.crassa</i>           | -0.323 | -0.567 | -0.080 | 0.005 |
| EpilithicBiofilm- <i>F.crassa</i>    | -0.024 | -0.268 | 0.219  | 1.000 |
| <i>S.lessonii-S.raucana</i>          | -0.277 | -0.521 | -0.033 | 0.020 |
| EpilithicBiofilm- <i>S.raucana</i>   | 0.022  | -0.221 | 0.266  | 1.000 |
| EpilithicBiofilm- <i>S.lessonii</i>  | 0.299  | 0.042  | 0.556  | 0.017 |

**Table S2:** Tukey post hoc test multiple comparisons of Shannon index of the microbial communities of the pedal mucus microbiota and the epilithic biofilms. 95% family-wise confidence level. Rarefaction level of 1,869 reads.

| Comparisons                          | diff   | lwr    | upr    | p adj |
|--------------------------------------|--------|--------|--------|-------|
| <i>E.peruviana-C.granosus</i>        | -0.115 | -0.236 | 0.006  | 0.069 |
| EpilithicBiofilm- <i>C.granosus</i>  | 0.069  | -0.052 | 0.190  | 0.492 |
| <i>F.crassa-C.granosus</i>           | 0.028  | -0.087 | 0.143  | 0.971 |
| <i>S.raucana-C.granosus</i>          | -0.056 | -0.171 | 0.059  | 0.649 |
| <i>S.lessonii-C.granosus</i>         | -0.126 | -0.247 | -0.004 | 0.040 |
| EpilithicBiofilm- <i>E.peruviana</i> | 0.184  | 0.063  | 0.306  | 0.001 |
| <i>F.crassa-E.peruviana</i>          | 0.143  | 0.028  | 0.258  | 0.010 |
| <i>S.raucana-E.peruviana</i>         | 0.059  | -0.056 | 0.174  | 0.599 |
| <i>S.lessonii-E.peruviana</i>        | -0.010 | -0.132 | 0.111  | 1.000 |
| <i>F.crassa</i> -EpilithicBiofilm    | -0.041 | -0.156 | 0.074  | 0.863 |
| <i>S.raucana</i> -EpilithicBiofilm   | -0.125 | -0.240 | -0.010 | 0.028 |
| <i>S.lessonii</i> -EpilithicBiofilm  | -0.195 | -0.316 | -0.073 | 0.001 |
| <i>S.raucana-F.crassa</i>            | -0.084 | -0.192 | 0.025  | 0.193 |
| <i>S.lessonii-F.crassa</i>           | -0.153 | -0.268 | -0.038 | 0.005 |
| <i>S.lessonii-S.raucana</i>          | -0.070 | -0.185 | 0.045  | 0.430 |



**Table S3:** Tukey post hoc test multiple comparisons of richness of the microbial communities of the pedal mucus microbiota. 95% family-wise confidence level. Dataset with a rarefaction level of 10,599 reads.

| Comparisons                   | diff   | lwr    | upr    | p adj        |
|-------------------------------|--------|--------|--------|--------------|
| <b>E.peruviana-C.granosus</b> | -0.359 | -0.607 | -0.111 | <b>0.003</b> |
| <b>F.crassa-C.granosus</b>    | -0.100 | -0.335 | 0.136  | 0.700        |
| <b>S.raucana-C.granosus</b>   | -0.039 | -0.275 | 0.197  | 0.986        |
| <b>S.lessonii-C.granosus</b>  | -0.346 | -0.594 | -0.097 | <b>0.004</b> |
| <b>F.crassa-E.peruviana</b>   | 0.259  | 0.023  | 0.495  | <b>0.027</b> |
| <b>S.raucana-E.peruviana</b>  | 0.320  | 0.084  | 0.556  | <b>0.005</b> |
| <b>S.lessonii-E.peruviana</b> | 0.013  | -0.235 | 0.262  | 1.000        |
| <b>S.raucana-F.crassa</b>     | 0.061  | -0.161 | 0.283  | 0.916        |
| <b>S.lessonii-F.crassa</b>    | -0.246 | -0.481 | -0.010 | <b>0.039</b> |
| <b>S.lessonii-S.raucana</b>   | -0.307 | -0.542 | -0.071 | <b>0.008</b> |

**Table S4:** Tukey post hoc test multiple comparisons of Shannon index of the microbial communities of the pedal mucus microbiota. 95% family-wise confidence level. Dataset with a rarefaction level of 10,599 reads.

| Comparisons                   | diff          | lwr           | upr           | p adj        |
|-------------------------------|---------------|---------------|---------------|--------------|
| <b>E.peruviana-C.granosus</b> | -0.121        | -0.250        | 0.008         | 0.073        |
| <b>F.crassa-C.granosus</b>    | 0.022         | -0.101        | 0.145         | 0.981        |
| <b>S.raucana-C.granosus</b>   | -0.057        | -0.180        | 0.065         | 0.622        |
| <b>S.lessonii-C.granosus</b>  | -0.127        | -0.256        | 0.002         | 0.056        |
| <b>F.crassa-E.peruviana</b>   | <b>0.143</b>  | <b>0.020</b>  | <b>0.266</b>  | <b>0.018</b> |
| <b>S.raucana-E.peruviana</b>  | 0.064         | -0.059        | 0.186         | 0.530        |
| <b>S.lessonii-E.peruviana</b> | -0.006        | -0.135        | 0.123         | 1.000        |
| <b>S.raucana-F.crassa</b>     | -0.079        | -0.195        | 0.036         | 0.269        |
| <b>S.lessonii-F.crassa</b>    | <b>-0.149</b> | <b>-0.272</b> | <b>-0.026</b> | <b>0.013</b> |
| <b>S.lessonii-S.raucana</b>   | -0.070        | -0.192        | 0.053         | 0.446        |

## Supplement 7

**Table S1:** ASVs habitat specialist to a specific pedal mucus microbiota of *Chiton granosus*, *Echinolittorina peruviana*, *Fissurella crassa*, *Scurria araucana* and *Siphonaria lessonii* with the associated probability (p). Number of reads and ASVs Taxa classification is also presented. Dataset with a rarefaction level of 10,599 reads.

| ASV     | Number of reads | pVal  | Microbiota         | Phylum             | Class               | Order              | Family            | Genus                             |
|---------|-----------------|-------|--------------------|--------------------|---------------------|--------------------|-------------------|-----------------------------------|
| ASV_12  | 8759            | 0.017 | <i>E.peruviana</i> | Epsilonbacteraeota | Campylobacteria     | Campylobacterales  | Arcobacteraceae   | Arcobacter                        |
| ASV_43  | 8468            | 0.009 | <i>C.granosus</i>  | Bacteroidetes      | Bacteroidia         | Flavobacteriales   | Crocinitomicaceae | Crocinitomix                      |
| ASV_16  | 6440            | 0.038 | <i>E.peruviana</i> | Proteobacteria     | Gammaproteobacteria | Alteromonadales    | Colwelliaceae     | Colwellia                         |
| ASV_22  | 6184            | 0.024 | <i>S.araucana</i>  | Proteobacteria     | Alphaproteobacteria | Rhodobacterales    | Rhodobacteraceae  | Pseudophaeobacter                 |
| ASV_56  | 5505            | 0.001 | <i>F.crassa</i>    | Bacteroidetes      | Bacteroidia         | Flavobacteriales   | Flavobacteriaceae | Tenacibaculum                     |
| ASV_26  | 4781            | 0.004 | <i>S.araucana</i>  | Bacteroidetes      | Bacteroidia         | Flavobacteriales   | Flavobacteriaceae | Polaribacter                      |
| ASV_98  | 3722            | 0.009 | <i>F.crassa</i>    | Bacteroidetes      | Bacteroidia         | Flavobacteriales   | Flavobacteriaceae | NA                                |
| ASV_134 | 3443            | 0.001 | <i>F.crassa</i>    | Bacteroidetes      | Bacteroidia         | Flavobacteriales   | Flavobacteriaceae | Polaribacter_4                    |
| ASV_51  | 3269            | 0.024 | <i>S.araucana</i>  | Proteobacteria     | Alphaproteobacteria | Rhodobacterales    | Rhodobacteraceae  | Roseobacter_clade_NAC11-7_lineage |
| ASV_139 | 3224            | 0.001 | <i>F.crassa</i>    | Bacteroidetes      | Bacteroidia         | Flavobacteriales   | Flavobacteriaceae | Tenacibaculum                     |
| ASV_23  | 2663            | 0.023 | <i>E.peruviana</i> | Proteobacteria     | Gammaproteobacteria | Oceanospirillales  | Nitrincolaceae    | Neptuniibacter                    |
| ASV_232 | 2181            | 0.001 | <i>F.crassa</i>    | Bacteroidetes      | Bacteroidia         | Flavobacteriales   | Flavobacteriaceae | NA                                |
| ASV_163 | 2153            | 0.003 | <i>C.granosus</i>  | Bacteroidetes      | Bacteroidia         | Flavobacteriales   | Crocinitomicaceae | Crocinitomix                      |
| ASV_208 | 2040            | 0.006 | <i>C.granosus</i>  | Bacteroidetes      | Bacteroidia         | Flavobacteriales   | Flavobacteriaceae | Olleya                            |
| ASV_166 | 1942            | 0.026 | <i>C.granosus</i>  | Bacteroidetes      | Bacteroidia         | Flavobacteriales   | Flavobacteriaceae | Olleya                            |
| ASV_82  | 1926            | 0.001 | <i>S.araucana</i>  | Bacteroidetes      | Bacteroidia         | Flavobacteriales   | Flavobacteriaceae | NA                                |
| ASV_234 | 1676            | 0.04  | <i>C.granosus</i>  | Bacteroidetes      | Bacteroidia         | Flavobacteriales   | Crocinitomicaceae | Crocinitomix                      |
| ASV_83  | 1647            | 0.03  | <i>E.peruviana</i> | Proteobacteria     | Gammaproteobacteria | Alteromonadales    | Colwelliaceae     | Colwellia                         |
| ASV_138 | 1484            | 0.001 | <i>F.crassa</i>    | Bacteroidetes      | Bacteroidia         | Flavobacteriales   | Flavobacteriaceae | Polaribacter_4                    |
| ASV_312 | 1478            | 0.002 | <i>C.granosus</i>  | Bacteroidetes      | Bacteroidia         | Flavobacteriales   | Flavobacteriaceae | Olleya                            |
| ASV_274 | 1464            | 0.001 | <i>F.crassa</i>    | Bacteroidetes      | Bacteroidia         | Flavobacteriales   | Flavobacteriaceae | Nonlabens                         |
| ASV_150 | 1435            | 0.001 | <i>S.araucana</i>  | Bacteroidetes      | Bacteroidia         | Flavobacteriales   | Flavobacteriaceae | Pseudofulvibacter                 |
| ASV_316 | 1200            | 0.001 | <i>F.crassa</i>    | Bacteroidetes      | Bacteroidia         | Flavobacteriales   | Flavobacteriaceae | Lacinutrix                        |
| ASV_131 | 1170            | 0.001 | <i>S.araucana</i>  | Proteobacteria     | Gammaproteobacteria | Oceanospirillales  | Nitrincolaceae    | Marinobacterium                   |
| ASV_302 | 959             | 0.001 | <i>F.crassa</i>    | Proteobacteria     | Alphaproteobacteria | Rhodobacterales    | Rhodobacteraceae  | Roseobacter                       |
| ASV_264 | 951             | 0.012 | <i>F.crassa</i>    | Proteobacteria     | Gammaproteobacteria | Oceanospirillales  | Nitrincolaceae    | Amphritea                         |
| ASV_256 | 870             | 0.001 | <i>S.lessonii</i>  | Proteobacteria     | Gammaproteobacteria | Alteromonadales    | Alteromonadaceae  | Paraglaciicola                    |
| ASV_586 | 857             | 0.001 | <i>F.crassa</i>    | Bacteroidetes      | Bacteroidia         | Flavobacteriales   | Flavobacteriaceae | Polaribacter_4                    |
| ASV_509 | 829             | 0.008 | <i>C.granosus</i>  | Bacteroidetes      | Bacteroidia         | Flavobacteriales   | Crocinitomicaceae | Salinirepens                      |
| ASV_57  | 817             | 0.022 | <i>S.lessonii</i>  | Proteobacteria     | Gammaproteobacteria | Alteromonadales    | Alteromonadaceae  | Alteromonas                       |
| ASV_307 | 807             | 0.001 | <i>S.araucana</i>  | Bacteroidetes      | Bacteroidia         | Flavobacteriales   | Flavobacteriaceae | Tenacibaculum                     |
| ASV_446 | 807             | 0.002 | <i>C.granosus</i>  | Bacteroidetes      | Bacteroidia         | Flavobacteriales   | Cryomorphaceae    | NS10_marine_group                 |
| ASV_486 | 802             | 0.003 | <i>F.crassa</i>    | Verrucomicrobia    | Verrucomicrobiae    | Verrucomicrobiales | Rubritaleaceae    | Rubritalea                        |
| ASV_504 | 796             | 0.001 | <i>F.crassa</i>    | Bacteroidetes      | Bacteroidia         | Flavobacteriales   | Flavobacteriaceae | Tenacibaculum                     |
| ASV_32  | 741             | 0.003 | <i>S.lessonii</i>  | Proteobacteria     | Gammaproteobacteria | Cellvibrionales    | Cellvibrionaceae  | Aestuariicella                    |
| ASV_27  | 730             | 0.013 | <i>F.crassa</i>    | Bacteroidetes      | Bacteroidia         | Flavobacteriales   | Flavobacteriaceae | Polaribacter                      |

|          |     |       |                    |                    |                     |                    |                        |                   |
|----------|-----|-------|--------------------|--------------------|---------------------|--------------------|------------------------|-------------------|
| ASV_473  | 729 | 0.014 | <i>F.crassa</i>    | Bacteroidetes      | Bacteroidia         | Flavobacteriales   | Flavobacteriaceae      | Lacinutrix        |
| ASV_546  | 729 | 0.001 | <i>F.crassa</i>    | Bacteroidetes      | Bacteroidia         | Flavobacteriales   | Flavobacteriaceae      | NA                |
| ASV_240  | 657 | 0.011 | <i>E.peruviana</i> | Epsilonbacteraeota | Campylobacteria     | Campylobacteriales | Arcobacteraceae        | Arcobacter        |
| ASV_581  | 554 | 0.001 | <i>F.crassa</i>    | Bacteroidetes      | Bacteroidia         | Flavobacteriales   | Flavobacteriaceae      | Tenacibaculum     |
| ASV_640  | 554 | 0.001 | <i>F.crassa</i>    | Bacteroidetes      | Bacteroidia         | Flavobacteriales   | Flavobacteriaceae      | NA                |
| ASV_306  | 532 | 0.002 | <i>S.raucana</i>   | Proteobacteria     | Gammaproteobacteria | Oceanospirillales  | Nitrincolaceae         | Marinobacterium   |
| ASV_734  | 492 | 0.001 | <i>F.crassa</i>    | Verrucomicrobia    | Verrucomicrobiae    | Verrucomicrobiales | Rubritaleaceae         | Rubritalea        |
| ASV_728  | 481 | 0.005 | <i>C.granosus</i>  | Bacteroidetes      | Bacteroidia         | Flavobacteriales   | Flavobacteriaceae      | Flavirhabdus      |
| ASV_719  | 444 | 0.002 | <i>F.crassa</i>    | Bacteroidetes      | Bacteroidia         | Flavobacteriales   | Crocinitomicaceae      | NA                |
| ASV_30   | 442 | 0.001 | <i>F.crassa</i>    | Proteobacteria     | Alphaproteobacteria | Rhodobacterales    | Rhodobacteraceae       | Loktanella        |
| ASV_810  | 436 | 0.006 | <i>F.crassa</i>    | Bacteroidetes      | Bacteroidia         | Flavobacteriales   | Flavobacteriaceae      | NA                |
| ASV_717  | 417 | 0.008 | <i>C.granosus</i>  | Bacteroidetes      | Bacteroidia         | Flavobacteriales   | Flavobacteriaceae      | Aurantivirga      |
| ASV_782  | 414 | 0.001 | <i>F.crassa</i>    | Bacteroidetes      | Bacteroidia         | Flavobacteriales   | Flavobacteriaceae      | Polaribacter_3    |
| ASV_160  | 412 | 0.005 | <i>E.peruviana</i> | Proteobacteria     | Gammaproteobacteria | Oceanospirillales  | Nitrincolaceae         | Neptuniibacter    |
| ASV_624  | 410 | 0.01  | <i>F.crassa</i>    | Proteobacteria     | Alphaproteobacteria | Rhodobacterales    | Rhodobacteraceae       | NA                |
| ASV_463  | 400 | 0.035 | <i>F.crassa</i>    | Bacteroidetes      | Bacteroidia         | Flavobacteriales   | Flavobacteriaceae      | Kordia            |
| ASV_712  | 400 | 0.006 | <i>C.granosus</i>  | Bacteroidetes      | Bacteroidia         | Flavobacteriales   | Crocinitomicaceae      | Crocinitomix      |
| ASV_803  | 385 | 0.001 | <i>F.crassa</i>    | Bacteroidetes      | Bacteroidia         | Flavobacteriales   | Flavobacteriaceae      | NA                |
| ASV_972  | 373 | 0.031 | <i>F.crassa</i>    | Bacteroidetes      | Bacteroidia         | Flavobacteriales   | Flavobacteriaceae      | Tenacibaculum     |
| ASV_986  | 354 | 0.002 | <i>F.crassa</i>    | Bacteroidetes      | Bacteroidia         | Flavobacteriales   | Flavobacteriaceae      | NA                |
| ASV_899  | 339 | 0.003 | <i>C.granosus</i>  | Bacteroidetes      | Bacteroidia         | Flavobacteriales   | Flavobacteriaceae      | NA                |
| ASV_815  | 318 | 0.001 | <i>F.crassa</i>    | Bacteroidetes      | Bacteroidia         | Flavobacteriales   | Flavobacteriaceae      | Dokdonia          |
| ASV_558  | 316 | 0.011 | <i>S.lessonii</i>  | Proteobacteria     | Alphaproteobacteria | Rhodobacterales    | Rhodobacteraceae       | Loktanella        |
| ASV_540  | 315 | 0.001 | <i>S.raucana</i>   | Bacteroidetes      | Bacteroidia         | Flavobacteriales   | Flavobacteriaceae      | Tenacibaculum     |
| ASV_537  | 312 | 0.006 | <i>C.granosus</i>  | Bacteroidetes      | Bacteroidia         | Flavobacteriales   | Flavobacteriaceae      | Polaribacter_4    |
| ASV_715  | 300 | 0.004 | <i>S.raucana</i>   | Proteobacteria     | Alphaproteobacteria | Rhodobacterales    | Rhodobacteraceae       | NA                |
| ASV_753  | 298 | 0.001 | <i>F.crassa</i>    | Bacteroidetes      | Bacteroidia         | Flavobacteriales   | Crocinitomicaceae      | Crocinitomix      |
| ASV_771  | 290 | 0.001 | <i>F.crassa</i>    | Bacteroidetes      | Bacteroidia         | Cytophagales       | Cyclobacteriaceae      | NA                |
| ASV_754  | 289 | 0.003 | <i>C.granosus</i>  | Bacteroidetes      | Bacteroidia         | Flavobacteriales   | Flavobacteriaceae      | Tenacibaculum     |
| ASV_992  | 289 | 0.002 | <i>C.granosus</i>  | Bacteroidetes      | Bacteroidia         | Flavobacteriales   | Flavobacteriaceae      | NA                |
| ASV_366  | 287 | 0.026 | <i>S.raucana</i>   | Bacteroidetes      | Bacteroidia         | Flavobacteriales   | Flavobacteriaceae      | Tenacibaculum     |
| ASV_668  | 264 | 0.001 | <i>F.crassa</i>    | Bacteroidetes      | Bacteroidia         | Flavobacteriales   | Flavobacteriaceae      | Pseudofulvibacter |
| ASV_354  | 257 | 0.001 | <i>F.crassa</i>    | Proteobacteria     | Gammaproteobacteria | Alteromonadales    | Pseudoalteromonadaceae | Pseudoalteromonas |
| ASV_1157 | 249 | 0.011 | <i>F.crassa</i>    | Bacteroidetes      | Bacteroidia         | Flavobacteriales   | Flavobacteriaceae      | Tenacibaculum     |
| ASV_854  | 248 | 0.041 | <i>C.granosus</i>  | Proteobacteria     | Alphaproteobacteria | Rhodobacterales    | Rhodobacteraceae       | Roseobacter       |
| ASV_1062 | 231 | 0.001 | <i>F.crassa</i>    | Bacteroidetes      | Bacteroidia         | Flavobacteriales   | Flavobacteriaceae      | NA                |
| ASV_858  | 230 | 0.001 | <i>F.crassa</i>    | Bacteroidetes      | Bacteroidia         | Flavobacteriales   | Flavobacteriaceae      | Algibacter        |
| ASV_1038 | 230 | 0.002 | <i>F.crassa</i>    | Proteobacteria     | Deltaproteobacteria | Bdellovibrionales  | Bacteriovoracaceae     | Peredibacter      |
| ASV_1224 | 227 | 0.009 | <i>C.granosus</i>  | Bacteroidetes      | Bacteroidia         | Flavobacteriales   | Flavobacteriaceae      | Tenacibaculum     |
| ASV_1193 | 223 | 0.007 | <i>C.granosus</i>  | Bacteroidetes      | Bacteroidia         | Flavobacteriales   | Flavobacteriaceae      | NA                |
| ASV_1029 | 221 | 0.021 | <i>C.granosus</i>  | Bacteroidetes      | Bacteroidia         | Flavobacteriales   | Flavobacteriaceae      | Príca             |
| ASV_1133 | 217 | 0.001 | <i>C.granosus</i>  | Proteobacteria     | Alphaproteobacteria | Rhodobacterales    | Rhodobacteraceae       | Thalassobius      |
| ASV_1050 | 214 | 0.04  | <i>C.granosus</i>  | Proteobacteria     | Gammaproteobacteria | Alteromonadales    | Alteromonadaceae       | Paraglaciocola    |
| ASV_1274 | 204 | 0.001 | <i>F.crassa</i>    | Bacteroidetes      | Bacteroidia         | Flavobacteriales   | Flavobacteriaceae      | NA                |
| ASV_1429 | 199 | 0.001 | <i>F.crassa</i>    | Bacteroidetes      | Bacteroidia         | Flavobacteriales   | Flavobacteriaceae      | Tenacibaculum     |
| ASV_1278 | 195 | 0.008 | <i>F.crassa</i>    | Proteobacteria     | Alphaproteobacteria | Rhodobacterales    | Rhodobacteraceae       | Pseudophaeobacter |
| ASV_1364 | 194 | 0.005 | <i>C.granosus</i>  | Bacteroidetes      | Bacteroidia         | Flavobacteriales   | Flavobacteriaceae      | NA                |
| ASV_595  | 180 | 0.004 | <i>C.granosus</i>  | Bacteroidetes      | Bacteroidia         | Flavobacteriales   | Flavobacteriaceae      | Tenacibaculum     |
| ASV_1174 | 177 | 0.005 | <i>F.crassa</i>    | Proteobacteria     | Gammaproteobacteria | Vibrionales        | Vibrionaceae           | Vibrio            |

|          |     |       |                    |                 |                     |                    |                    |                   |
|----------|-----|-------|--------------------|-----------------|---------------------|--------------------|--------------------|-------------------|
| ASV_1489 | 172 | 0.004 | <i>C.granosus</i>  | Verrucomicrobia | Verrucomicrobiae    | Verrucomicrobiales | Rubritaleaceae     | Rubritalea        |
| ASV_864  | 169 | 0.001 | <i>F.crassa</i>    | Bacteroidetes   | Bacteroidia         | Flavobacteriales   | Flavobacteriaceae  | Aquibacter        |
| ASV_1459 | 167 | 0.001 | <i>F.crassa</i>    | Spirochaetes    | Spirochaetia        | Spirochaetales     | Spirochaetaceae    | NA                |
| ASV_1639 | 165 | 0.001 | <i>C.granosus</i>  | Bacteroidetes   | Bacteroidia         | Flavobacteriales   | Flavobacteriaceae  | Nonlabens         |
| ASV_1551 | 162 | 0.001 | <i>F.crassa</i>    | Proteobacteria  | Gammaproteobacteria | Cardiobacteriales  | Cardiobacteriaceae | NA                |
| ASV_1523 | 161 | 0.001 | <i>C.granosus</i>  | Bacteroidetes   | Bacteroidia         | Cytophagales       | Cyclobacteriaceae  | Persicobacter     |
| ASV_825  | 152 | 0.001 | <i>E.peruviana</i> | Verrucomicrobia | Verrucomicrobiae    | Verrucomicrobiales | Rubritaleaceae     | Rubritalea        |
| ASV_1536 | 152 | 0.001 | <i>F.crassa</i>    | Proteobacteria  | Deltaproteobacteria | Bdellovibrionales  | Bacteriovoraceae   | NA                |
| ASV_1730 | 152 | 0.003 | <i>F.crassa</i>    | Bacteroidetes   | Bacteroidia         | Flavobacteriales   | Flavobacteriaceae  | Pricia            |
| ASV_987  | 150 | 0.001 | <i>S.saraucana</i> | Bacteroidetes   | Bacteroidia         | Flavobacteriales   | Flavobacteriaceae  | Aurantivirga      |
| ASV_1654 | 149 | 0.001 | <i>C.granosus</i>  | Bacteroidetes   | Bacteroidia         | Chitinophagales    | Saprospiraceae     | NA                |
| ASV_96   | 146 | 0.015 | <i>C.granosus</i>  | Proteobacteria  | Alphaproteobacteria | Rhodobacterales    | Rhodobacteraceae   | Sulfitobacter     |
| ASV_145  | 146 | 0.001 | <i>F.crassa</i>    | Proteobacteria  | Alphaproteobacteria | Rhodobacterales    | Rhodobacteraceae   | Planktotalea      |
| ASV_1335 | 144 | 0.043 | <i>C.granosus</i>  | Patescibacteria | Gracilibacteria     | JGI_0000069-P22    | NA                 | NA                |
| ASV_1558 | 140 | 0.011 | <i>C.granosus</i>  | Bacteroidetes   | Bacteroidia         | Flavobacteriales   | Flavobacteriaceae  | Olleya            |
| ASV_964  | 138 | 0.035 | <i>E.peruviana</i> | Bacteroidetes   | Bacteroidia         | Flavobacteriales   | Flavobacteriaceae  | NA                |
| ASV_1377 | 135 | 0.002 | <i>F.crassa</i>    | Proteobacteria  | Gammaproteobacteria | Alteromonadales    | Shewanellaceae     | Shewanella        |
| ASV_700  | 134 | 0.002 | <i>S.saraucana</i> | Proteobacteria  | Gammaproteobacteria | Oceanospirillales  | Nitrincolaceae     | Neptuniibacter    |
| ASV_1658 | 134 | 0.002 | <i>C.granosus</i>  | Bacteroidetes   | Bacteroidia         | Flavobacteriales   | Flavobacteriaceae  | Dokdonia          |
| ASV_481  | 130 | 0.003 | <i>F.crassa</i>    | Bacteroidetes   | Bacteroidia         | Flavobacteriales   | Flavobacteriaceae  | Dokdonia          |
| ASV_1848 | 128 | 0.003 | <i>C.granosus</i>  | Bacteroidetes   | Bacteroidia         | Flavobacteriales   | Flavobacteriaceae  | Winogradskyella   |
| ASV_1417 | 127 | 0.009 | <i>E.peruviana</i> | Bacteroidetes   | Bacteroidia         | Flavobacteriales   | Flavobacteriaceae  | Polaribacter_4    |
| ASV_879  | 125 | 0.033 | <i>S.saraucana</i> | Bacteroidetes   | Bacteroidia         | Flavobacteriales   | Flavobacteriaceae  | NA                |
| ASV_1871 | 124 | 0.01  | <i>C.granosus</i>  | Bacteroidetes   | Bacteroidia         | Flavobacteriales   | Flavobacteriaceae  | Dokdonia          |
| ASV_1043 | 122 | 0.041 | <i>S.saraucana</i> | Bacteroidetes   | Bacteroidia         | Flavobacteriales   | Flavobacteriaceae  | Nonlabens         |
| ASV_1434 | 117 | 0.004 | <i>C.granosus</i>  | Proteobacteria  | Alphaproteobacteria | Rhizobiales        | Phyllobacteriaceae | Ahrensia          |
| ASV_1659 | 117 | 0.001 | <i>C.granosus</i>  | Bacteroidetes   | Bacteroidia         | Flavobacteriales   | Flavobacteriaceae  | Maribacter        |
| ASV_1118 | 116 | 0.005 | <i>S.saraucana</i> | Bacteroidetes   | Bacteroidia         | Flavobacteriales   | Flavobacteriaceae  | Pseudofulvibacter |
| ASV_934  | 115 | 0.027 | <i>S.saraucana</i> | Proteobacteria  | Gammaproteobacteria | Oceanospirillales  | Nitrincolaceae     | Profundimonas     |
| ASV_1918 | 115 | 0.002 | <i>C.granosus</i>  | Bacteroidetes   | Bacteroidia         | Flavobacteriales   | Flavobacteriaceae  | Tamlana           |
| ASV_2076 | 115 | 0.001 | <i>F.crassa</i>    | Verrucomicrobia | Verrucomicrobiae    | Verrucomicrobiales | Rubritaleaceae     | Persicirhabdus    |
| ASV_1921 | 114 | 0.003 | <i>C.granosus</i>  | Bacteroidetes   | Bacteroidia         | Flavobacteriales   | Flavobacteriaceae  | Winogradskyella   |
| ASV_1640 | 111 | 0.028 | <i>C.granosus</i>  | Proteobacteria  | Alphaproteobacteria | Rhodobacterales    | Rhodobacteraceae   | Alliioseovarius   |
| ASV_1990 | 108 | 0.005 | <i>C.granosus</i>  | Bacteroidetes   | Bacteroidia         | Flavobacteriales   | Flavobacteriaceae  | Dokdonia          |
| ASV_2275 | 108 | 0.018 | <i>F.crassa</i>    | Proteobacteria  | Gammaproteobacteria | Cardiobacteriales  | Cardiobacteriaceae | NA                |
| ASV_1058 | 104 | 0.03  | <i>S.saraucana</i> | Bacteroidetes   | Bacteroidia         | Flavobacteriales   | Flavobacteriaceae  | Aquimarina        |
| ASV_1119 | 104 | 0.012 | <i>S.lessonii</i>  | Proteobacteria  | Gammaproteobacteria | Oceanospirillales  | Marinomnadaceae    | Marinomonas       |
| ASV_175  | 101 | 0.003 | <i>C.granosus</i>  | Proteobacteria  | Alphaproteobacteria | Rhodobacterales    | Rhodobacteraceae   | Oceanibulbus      |

## Supplement 8.

**Table S1:** Tukey post hoc test multiple comparisons of carbohydrates content of the mollusk pedal mucus. 95% family-wise confidence level.

| Comparisons                   | diff              | lwr               | upr               | p adj            |
|-------------------------------|-------------------|-------------------|-------------------|------------------|
| E. peruviana-C. granosus      | 2.221739          | -19.699616        | 24.143094         | 0.9979968        |
| <b>F. crassa-C. granosus</b>  | <b>29.765217</b>  | <b>7.843862</b>   | <b>51.686573</b>  | <b>0.0048901</b> |
| S. araucana-C. granosus       | -9.078261         | -30.999616        | 12.843094         | 0.7293341        |
| S. lessonii-C. granosus       | -1.373913         | -23.295268        | 20.547442         | 0.9996977        |
| <b>F. crassa-E. peruviana</b> | <b>27.543478</b>  | <b>5.622123</b>   | <b>49.464834</b>  | <b>0.0096315</b> |
| S. araucana-E. peruviana      | -11.300000        | -33.221355        | 10.621355         | 0.5485567        |
| S. lessonii-E. peruviana      | -3.595652         | -25.517008        | 18.325703         | 0.9873329        |
| <b>S. araucana-F. crassa</b>  | <b>-38.843478</b> | <b>-60.764834</b> | <b>-16.922123</b> | <b>0.0002994</b> |
| <b>S. lessonii-F. crassa</b>  | <b>-31.139130</b> | <b>-53.060486</b> | <b>-9.217775</b>  | <b>0.0032046</b> |
| S. lessonii-S. araucana       | 7.704348          | -14.217008        | 29.625703         | 0.8283245        |

**Table S2:** Tukey post hoc test multiple comparisons of protein content of the mollusk pedal mucus. 95% family-wise confidence level.

| Comparisons                  | diff              | lwr               | upr               | p adj            |
|------------------------------|-------------------|-------------------|-------------------|------------------|
| E. peruviana-C. granosus     | 0.2441584         | -0.9536288        | 1.4419455         | 0.9718389        |
| <b>F. crassa-C. granosus</b> | <b>1.3365920</b>  | <b>0.1388048</b>  | <b>2.5343791</b>  | <b>0.0241524</b> |
| S. araucana-C. granosus      | -0.2691531        | -1.4669403        | 0.9286340         | 0.9601363        |
| S. lessonii-C. granosus      | 0.6728711         | -0.5249160        | 1.8706583         | 0.4669652        |
| F. crassa-E. peruviana       | 1.0924336         | -0.1053536        | 2.2902208         | 0.0845680        |
| S. araucana-E. peruviana     | -0.5133115        | -1.7110987        | 0.6844757         | 0.7045129        |
| S. lessonii-E. peruviana     | 0.4287128         | -0.7690744        | 1.6265000         | 0.8189422        |
| <b>S. araucana-F. crassa</b> | <b>-1.6057451</b> | <b>-2.8035323</b> | <b>-0.4079579</b> | <b>0.0054904</b> |
| S. lessonii-F. crassa        | -0.6637208        | -1.8615080        | 0.5340663         | 0.4801524        |
| S. lessonii-S. araucana      | 0.9420243         | -0.2557629        | 2.1398114         | 0.1695123        |

## Supplement 9.

**Figure S1.** Partition plot of the Linear Discriminant Analyses (LDA) between the Carbohydrates and Proteins content ( $\mu\text{g mL}^{-1}$ ) of the pedal mucus of (A) *Chiton granosus*, (B) *Echinolittorina peruviana*, (C) *Fissurella crassa*, (D) *Scurria araucana*, and (E) *Siphonaria lessonii*. Error rate: 0.5.

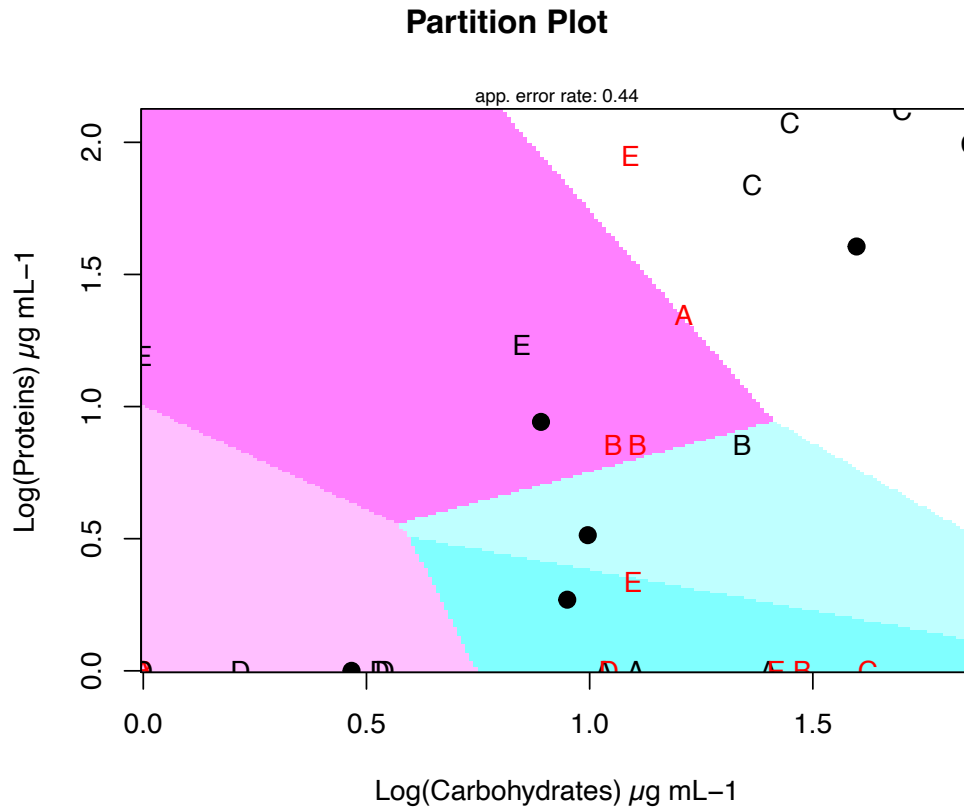

Supplement: 2.SupplementaryMaterial_CMAB_Jun2022.pdf [file 2.SupplementaryMaterial_CMAB_Jun2022.pdf]
